# Supplementary material for: Concurrent nivolumab and external beam radiation therapy for hepatocellular carcinoma with macrovascular invasion: A phase II study
Source: PubMed Central journal article supplement — JHEP Rep. 2023 Dec 21;6(4):100991. doi: 10.1016/j.jhepr.2023.100991 (PMC10920711; doi:10.1016/j.jhepr.2023.100991), 2023-12-21

**Concurrent nivolumab and external beam radiation therapy for  
hepatocellular carcinoma with macrovascular invasion: A phase II  
study**

Bo Hyun Kim, Hee Chul Park, Tae Hyun Kim, Yeong-Hwan Koh, Jung Yong Hong, Yuri  
Cho, Dong Hyun Sinn, Boram Park, Joong-Won Park

Table of content

Fig. S1.....2

Fig. S1. Study Schema

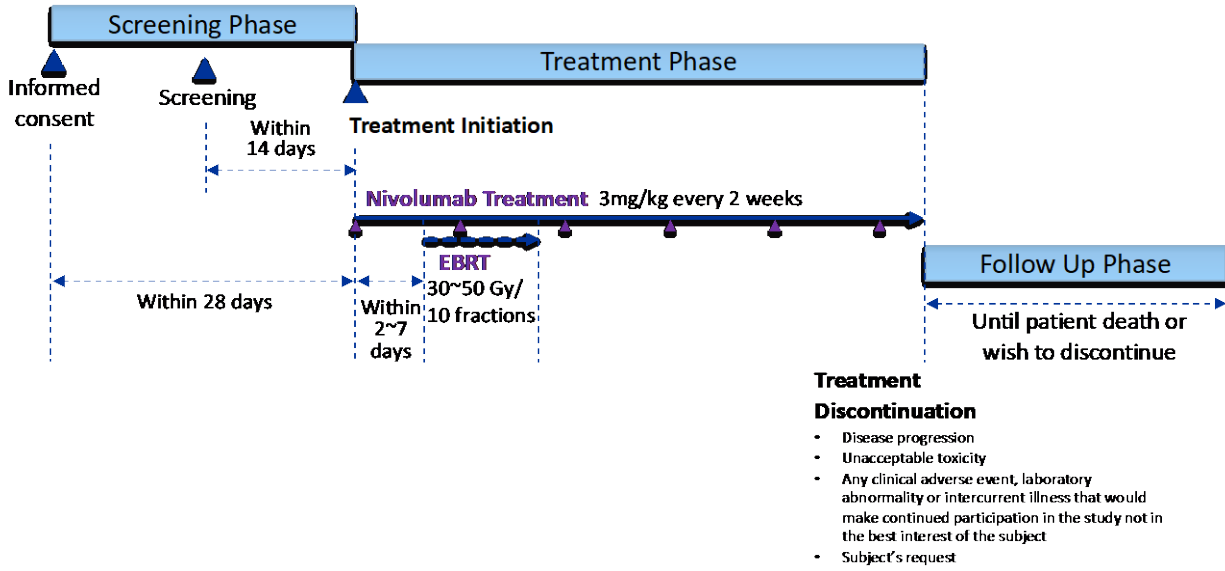

Supplement: mmc1.pdf [file mmc1.pdf]
